# Supplementary material for: Effect of Different Long-Term Potassium Dosages on Crop Yield and Potassium Use Efficiency in the Maize–Wheat Rotation System
Source: MDPI journal article supplement (doi:10.3390/agronomy12102565), 2022-10-19
Supplement: s1 [file s1]

## Supplementary Materials:

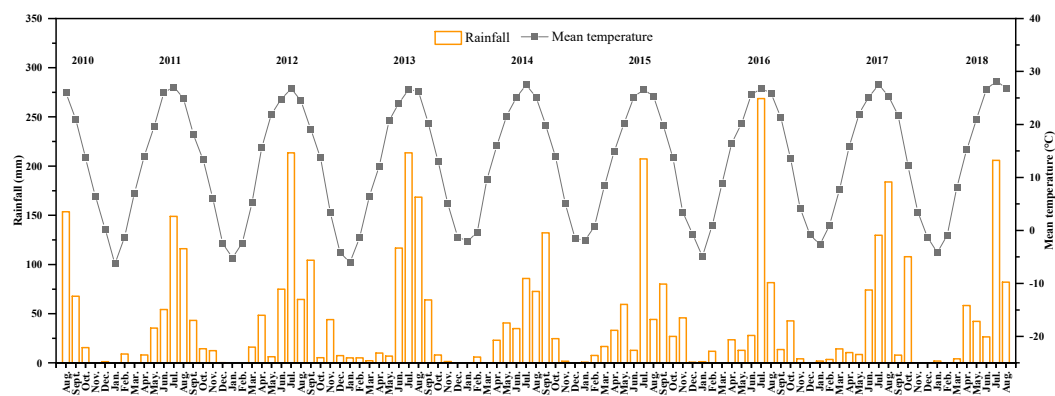

**Figure S1.** Monthly rainfall (mm) and mean temperature (°C) during the maize and wheat growing seasons from 2010 to 2018.

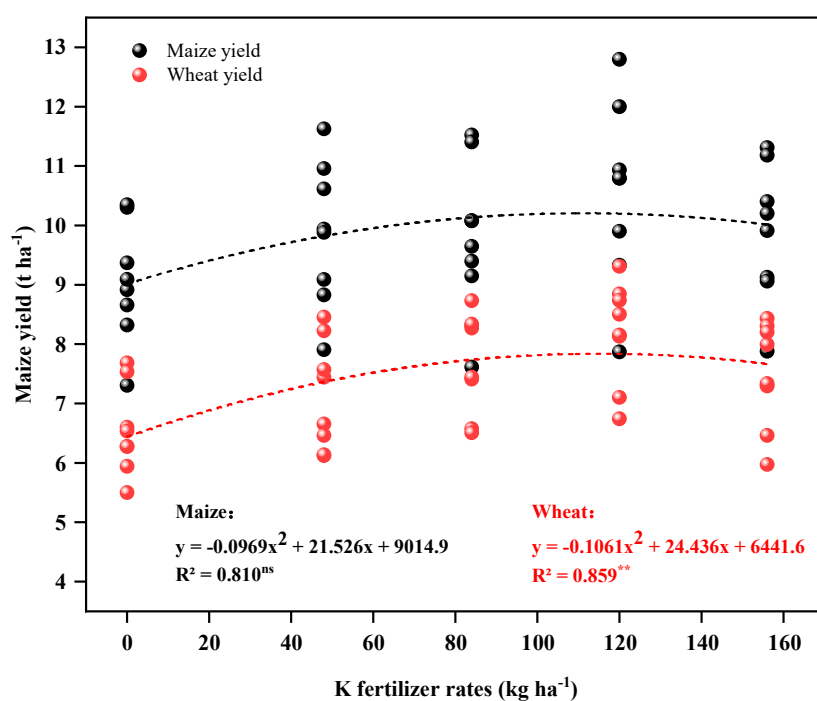

**Figure S2.** Effects of different K fertilization rates on the average yields of maize and wheat. K<sub>0</sub>, no K fertilizer application; K<sub>48</sub>, 48 kg K ha<sup>-1</sup>; K<sub>84</sub>, 84 kg K ha<sup>-1</sup>; K<sub>120</sub>, 120 kg K ha<sup>-1</sup>; K<sub>156</sub>, 156 kg K ha<sup>-1</sup>. Vertical T bars in the histogram indicate SE. Different letters indicate significant differences among treatments. The dashed lines represent the relationship. \*\* Significant at the .01 probability level. ns, nonsignificant at the .05 probability level.

**Table S1.** Effects of different K fertilization rates on maize yield composition between 2010-2017.

| Treatment                                                | 2010 | 2011  | 2012  | 2013  | 2014  | 2015  | 2016 | 2017  |
|----------------------------------------------------------|------|-------|-------|-------|-------|-------|------|-------|
| Effective spike number ( $\times 10^4 \text{ ha}^{-1}$ ) |      |       |       |       |       |       |      |       |
| K <sub>0</sub>                                           | 7.3a | 7.4b  | 7.6a  | 7.6b  | 7.5ab | 7.5ab | 7.4a | 7.3a  |
| K <sub>48</sub>                                          | 7.2a | 7.8a  | 7.6a  | 7.5b  | 7.5a  | 7.6a  | 7.4a | 7.2ab |
| K <sub>84</sub>                                          | 7.1a | 6.8c  | 7.5ab | 7.5b  | 7.3b  | 7.2c  | 7.3b | 7.0b  |
| K <sub>120</sub>                                         | 7.4a | 7.3b  | 7.4ab | 7.5b  | 7.4ab | 7.4b  | 7.4a | 7.1ab |
| K <sub>156</sub>                                         | 7.3a | 7.5b  | 7.2b  | 7.6a  | 7.4ab | 7.6a  | 7.5a | 7.2ab |
| Grain number per spike                                   |      |       |       |       |       |       |      |       |
| K <sub>0</sub>                                           | 486a | 480b  | 454b  | 490a  | 488b  | 588a  | 517a | 573a  |
| K <sub>48</sub>                                          | 480a | 488ab | 456b  | 495a  | 517a  | 540a  | 544a | 590a  |
| K <sub>84</sub>                                          | 488a | 499a  | 476ab | 508a  | 519a  | 579a  | 468a | 616a  |
| K <sub>120</sub>                                         | 489a | 504a  | 487a  | 515a  | 521a  | 592a  | 478a | 606a  |
| K <sub>156</sub>                                         | 484a | 498ab | 498a  | 493a  | 514a  | 562a  | 519a | 613a  |
| 1000-grain weight (g)                                    |      |       |       |       |       |       |      |       |
| K <sub>0</sub>                                           | 272b | 281b  | 247d  | 278c  | 317c  | 348c  | 280d | 295c  |
| K <sub>48</sub>                                          | 287a | 286ab | 248cd | 286bc | 322bc | 349c  | 283c | 299c  |
| K <sub>84</sub>                                          | 283a | 292a  | 251b  | 305a  | 323b  | 353bc | 297a | 302bc |
| K <sub>120</sub>                                         | 287a | 293a  | 254a  | 302a  | 333a  | 365a  | 296a | 322a  |
| K <sub>156</sub>                                         | 285a | 289ab | 249c  | 294ab | 324b  | 362ab | 289b | 319ab |

Values followed by different lower case letter(s) within a column are significant at  $p < 0.05$ .

**Table S2.** Effects of different K fertilization rates on wheat yield composition between 2010-2018.

| Treatments                                               | 2011   | 2012   | 2013   | 2014   | 2015   | 2016   | 2017   | 2018   |
|----------------------------------------------------------|--------|--------|--------|--------|--------|--------|--------|--------|
| Effective spike number ( $\times 10^4 \text{ ha}^{-1}$ ) |        |        |        |        |        |        |        |        |
| K <sub>0</sub>                                           | 615a   | 555c   | 570a   | 555a   | 540b   | 525b   | 630a   | 600b   |
| K <sub>48</sub>                                          | 630a   | 555c   | 540a   | 600a   | 615a   | 615a   | 675a   | 615ab  |
| K <sub>84</sub>                                          | 630a   | 675b   | 555a   | 600a   | 600a   | 600a   | 750a   | 630ab  |
| K <sub>120</sub>                                         | 660a   | 750a   | 570a   | 600a   | 600a   | 630a   | 720a   | 675ab  |
| K <sub>156</sub>                                         | 615a   | 600c   | 525a   | 615a   | 600a   | 630a   | 780a   | 690a   |
| Grain number per spike                                   |        |        |        |        |        |        |        |        |
| K <sub>0</sub>                                           | 37a    | 35ab   | 38a    | 35a    | 32a    | 41a    | 39a    | 38a    |
| K <sub>48</sub>                                          | 38a    | 35a    | 38a    | 37a    | 37a    | 40a    | 40a    | 39a    |
| K <sub>84</sub>                                          | 39a    | 32bc   | 39a    | 38a    | 39a    | 40a    | 38a    | 33b    |
| K <sub>120</sub>                                         | 39a    | 34abc  | 38a    | 40a    | 33a    | 40a    | 40a    | 32b    |
| K <sub>156</sub>                                         | 38a    | 31c    | 39a    | 38a    | 32a    | 41a    | 39a    | 37a    |
| 1000-grain weight (g)                                    |        |        |        |        |        |        |        |        |
| K <sub>0</sub>                                           | 40.6b  | 41.1b  | 36.1b  | 40.5b  | 34.1b  | 39.1c  | 42.6c  | 40.9b  |
| K <sub>48</sub>                                          | 41.6ab | 42.4ab | 36.2b  | 42.5ab | 36.0b  | 40.4bc | 45.6ab | 41.5ab |
| K <sub>84</sub>                                          | 42.4ab | 42.9ab | 37.4ab | 43.7a  | 37.3ab | 42.5a  | 45.1ab | 41.9ab |
| K <sub>120</sub>                                         | 43.0a  | 43.1a  | 38.4a  | 44.0a  | 39.9a  | 43.3a  | 46.6a  | 44.1a  |
| K <sub>156</sub>                                         | 41.1ab | 42.0ab | 35.6b  | 43.6a  | 36.5ab | 41.6ab | 44.0bc | 41.2ab |

Values followed by different lower case letter(s) within a column are significant at  $p < 0.05$ .

**Table S3.** Correlation analysis of maize and wheat yields, yield composition.

|                        | Maize   |                        |                        | Wheat   |                        |                        |
|------------------------|---------|------------------------|------------------------|---------|------------------------|------------------------|
|                        | Yield   | Effective spike number | Grain number per spike | Yield   | Effective spike number | Grain number per spike |
| Effective spike number | 0.108   |                        |                        | 0.552** | 1                      |                        |
| Grain number per spike | 0.217   | -0.351**               |                        | 0.324*  | 0.026                  | 1                      |
| 1000-grain weight      | 0.544** | -0.043                 | 0.243                  | 0.706** | 0.675**                | 0.166                  |

\* Significant at the .05 probability level. \*\* Significant at the .01 probability level.

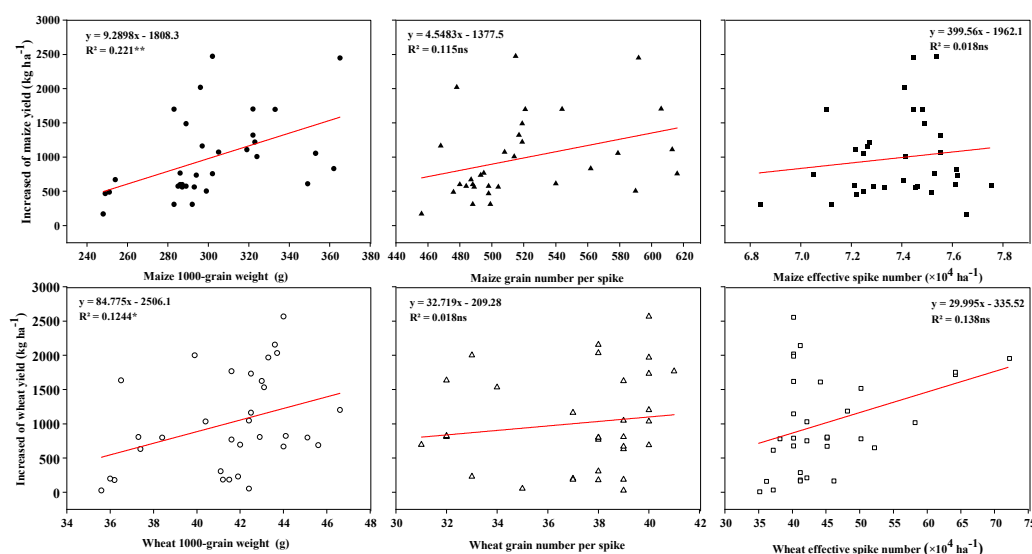

**Figure S3.** Linear regression between 1000-grain weight, grain number, effective spike number and increased of yield in maize and wheat by K application. \* Significant at the .05 probability level. \*\* Significant at the .01 probability level. ns, nonsignificant at the .05 probability level.

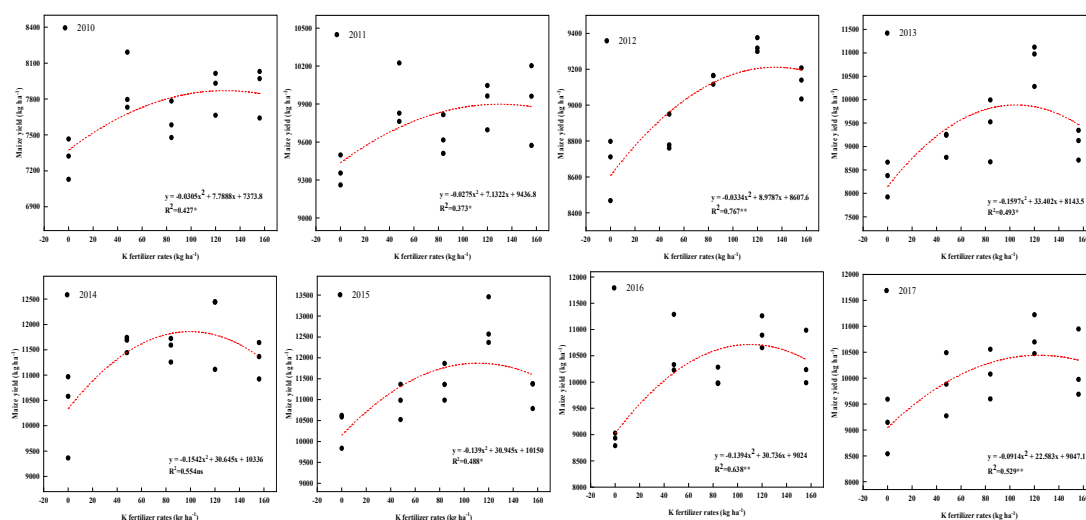

**Figure S4.** Regression analysis of maize yield with K fertilizer application in 2010-2017. The average price of maize grain was 2.02 ¥  $\text{kg}^{-1}$  (1.66-2.40 ¥  $\text{kg}^{-1}$ ) in 2010-2017; The average price of potassium chloride (60% K) was 3.5 ¥  $\text{kg}^{-1}$  (3.4-3.6 ¥  $\text{kg}^{-1}$ ) in 2010-2017. \* Significant at the .05 probability level. \*\* Significant at the .01 probability level. ns, nonsignificant at the .05 probability level.

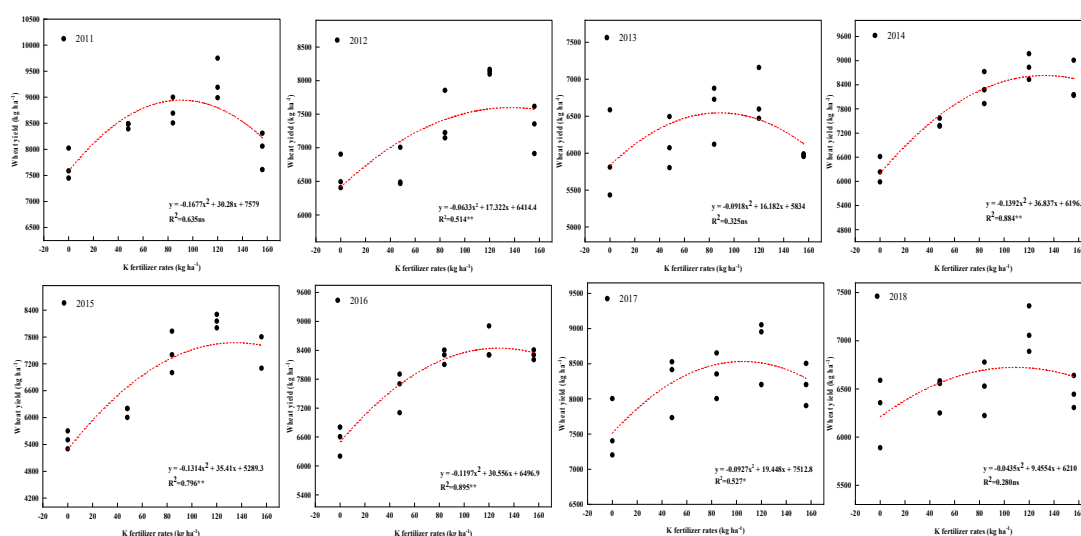

**Figure S5.** Regression analysis of wheat yield with K fertilizer application in 2011-2018. The average price of wheat grain was 2.32 ¥ kg<sup>-1</sup> (2.07-2.52 ¥ kg<sup>-1</sup>) in 2011-2018; The average price of potassium chloride (60% K) was 3.5 ¥ kg<sup>-1</sup> (3.4-3.6 ¥ kg<sup>-1</sup>) in 2010-2018. \* Significant at the .05 probability level. \*\* Significant at the .01 probability level. ns, nonsignificant at the .05 probability level.
